# Supplementary material for: Hierarchical Co@C-N synthesized by the confined pyrolysis of ionic liquid@metal–organic frameworks for the aerobic oxidation of alcohols
Source: Royal Society of Chemistry journal article supplement (doi:10.1039/d2nj00594h), 2022-01-01
Supplement: d2nj00594h1.pdf [file d2nj00594h1.pdf]

# New Journal of Chemistry

## Supporting Information

**Hierarchical Co@C-N synthesized by confined pyrolysis of ionic liquid@metal-organic framework for aerobic oxidation of alcohols**

Xiaomin Ma, Fengfeng Chen,\* Xin Zhang, Tingting Wang, Shengrong Yuan, Xusheng Wang, Tianjin Li, Junkuo Gao\*

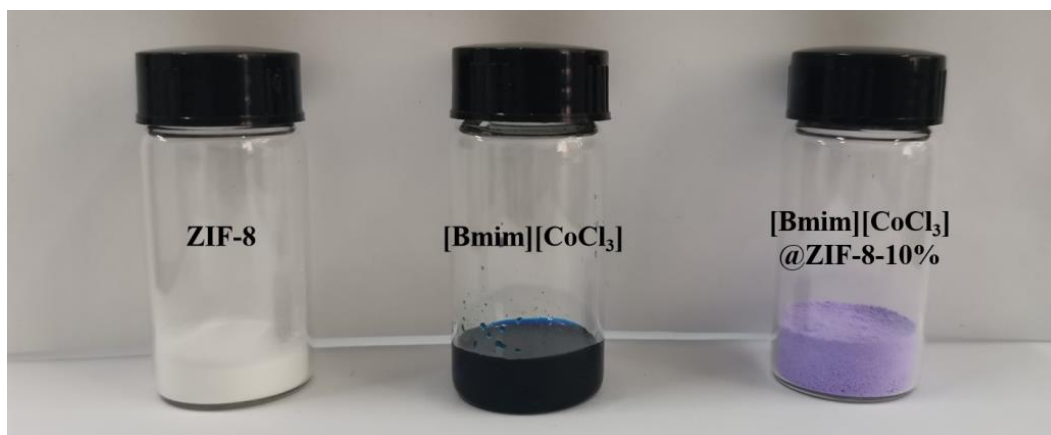

**Figure S1.** The photographs of ZIF-8, [Bmim][CoCl<sub>3</sub>], and [Bmim][CoCl<sub>3</sub>]@ZIF-8-10%.

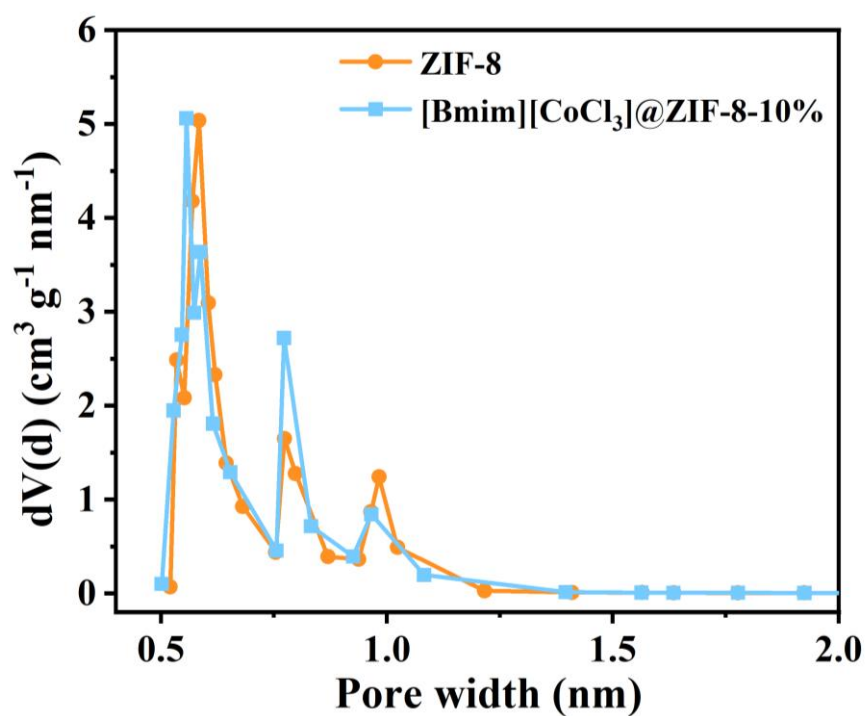

**Figure S2.** Pore size distributions of ZIF-8 and [Bmim][CoCl<sub>3</sub>]@ZIF-8-10%.

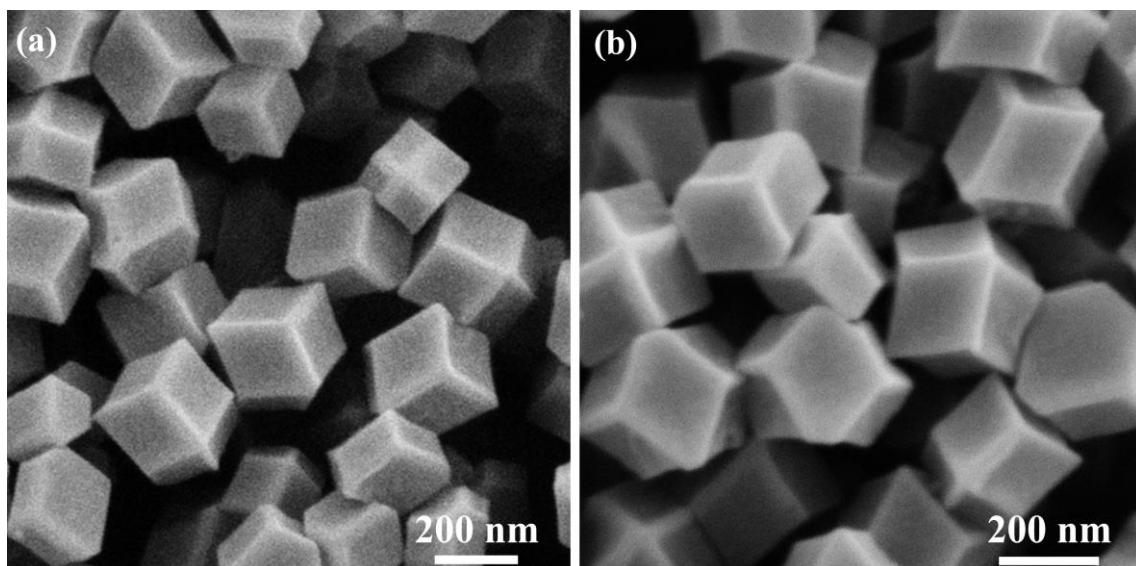

**Figure S3.** SEM images of ZIF-8 (a) and [Bmim][CoCl<sub>3</sub>]@ZIF-8-10% (b).

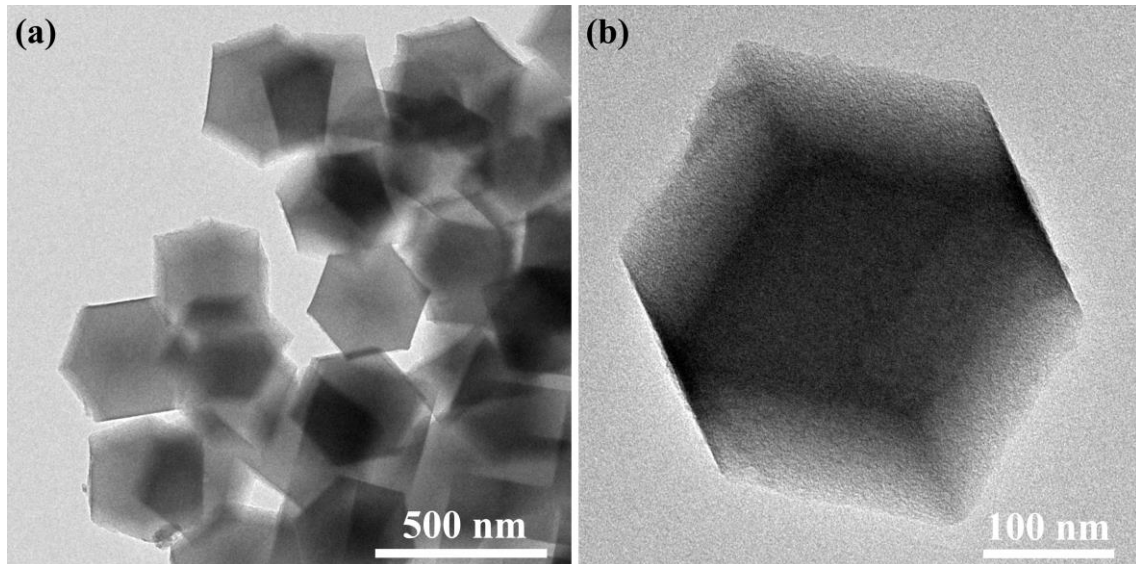

**Figure S4.** TEM images of C-N-900.

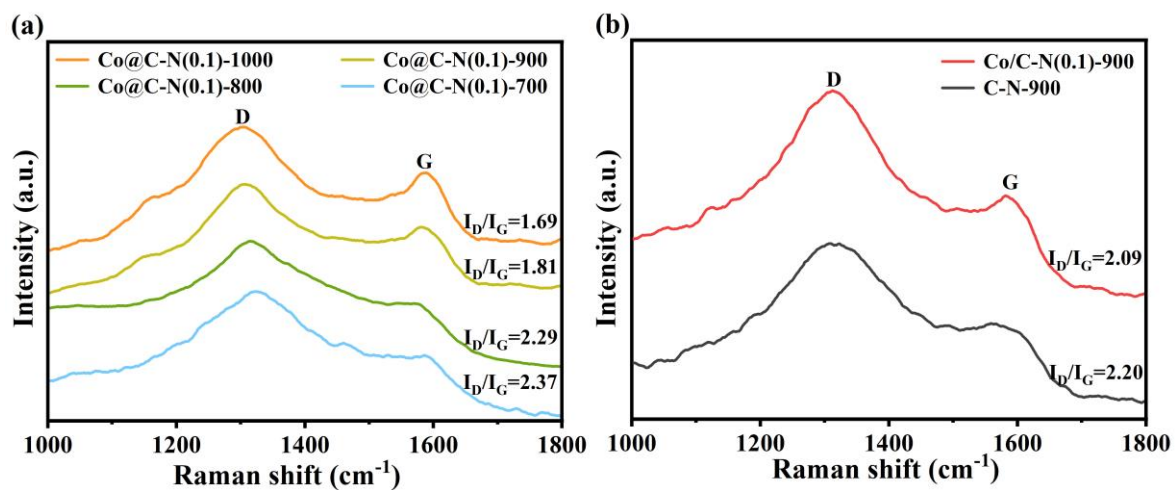

**Figure S5.** Raman spectra of Co@C-N(0.1)-T, C-N-900, and Co/C-N(0.1)-900.

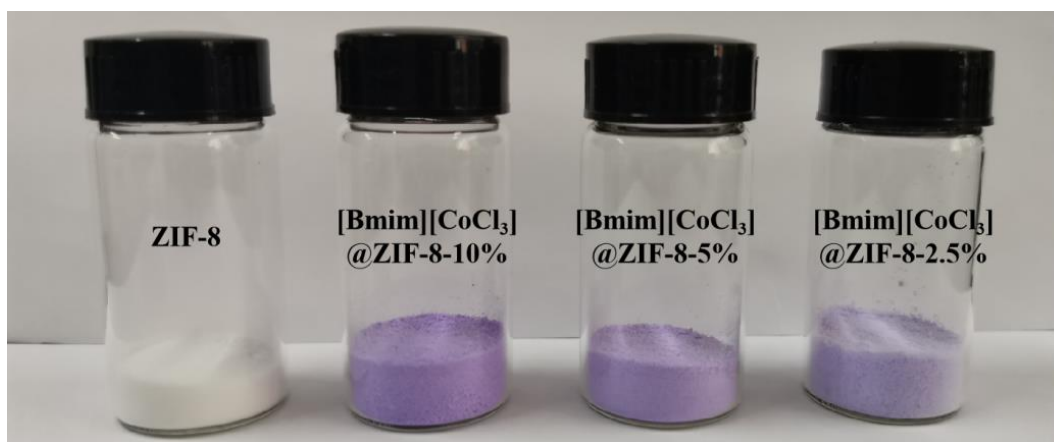

**Figure S6.** The photographs of the as-prepared ZIF-8 and [Bmim][CoCl<sub>3</sub>]@ZIF-8-x materials in this work.

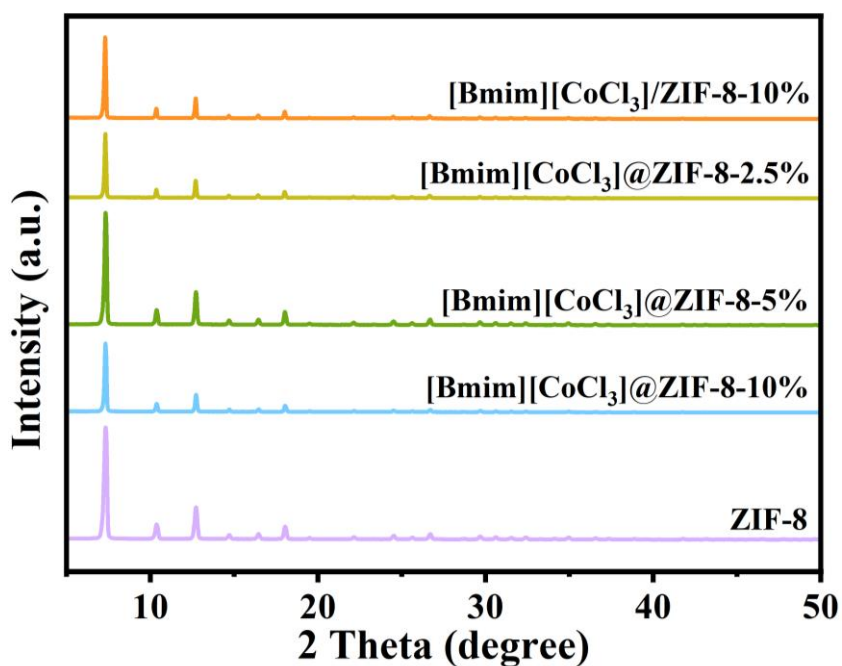

**Figure S7.** XRD patterns of ZIF-8, [Bmim][CoCl<sub>3</sub>]@ZIF-8-x, and [Bmim][CoCl<sub>3</sub>]/ZIF-8-10%.

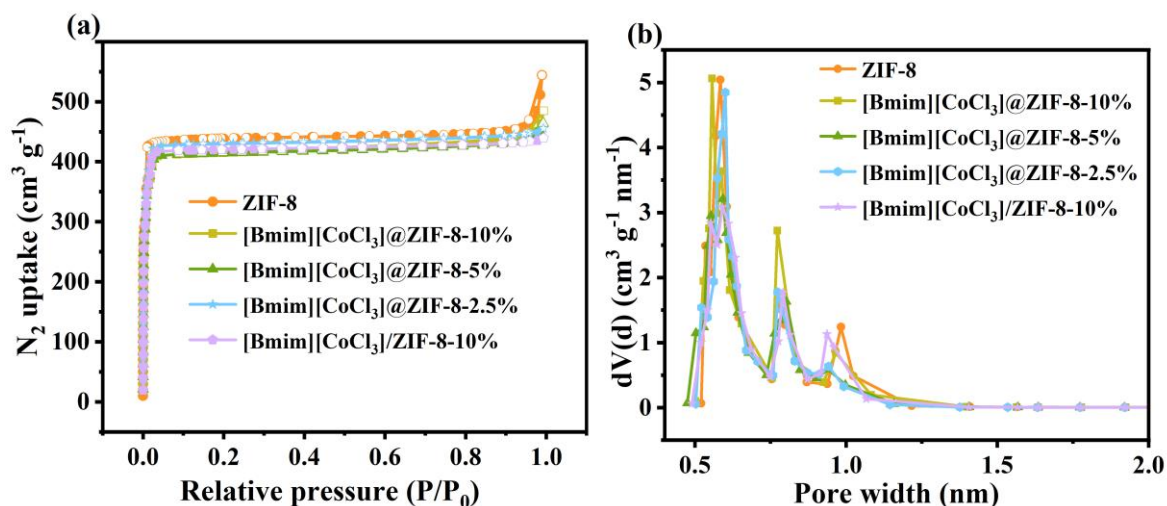

**Figure S8.** (a) N<sub>2</sub> adsorption isotherms and (b) pore size distributions of ZIF-8, [Bmim][CoCl<sub>3</sub>]@ZIF-8-x, and [Bmim][CoCl<sub>3</sub>]/ZIF-8-10%.

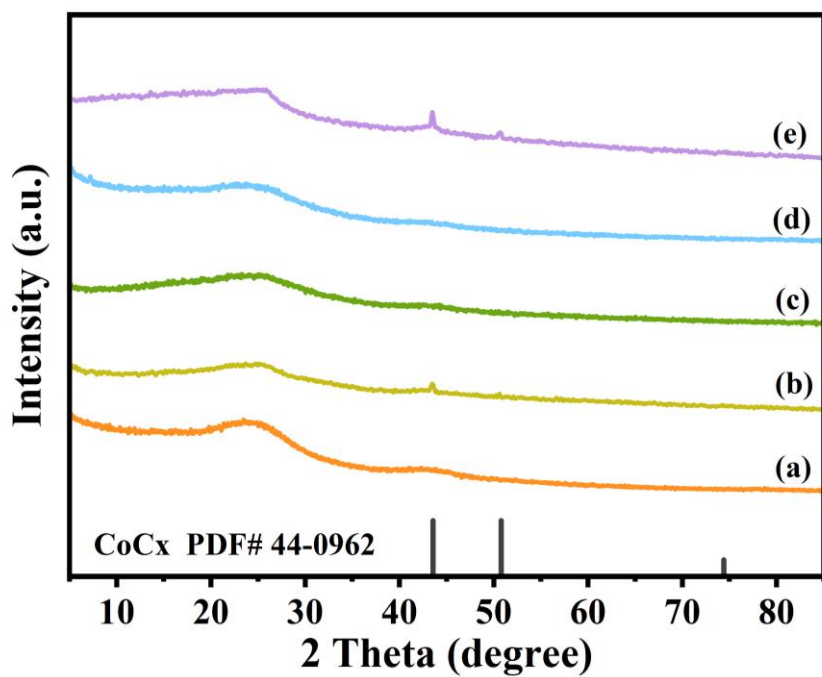

**Figure S9.** XRD patterns of (a) C-N-900, (b) Co@C-N(0.1)-900, (c) Co@C-N(0.05)-900, (d) Co@C-N(0.025)-900, and (e) Co/C-N(0.1)-900.

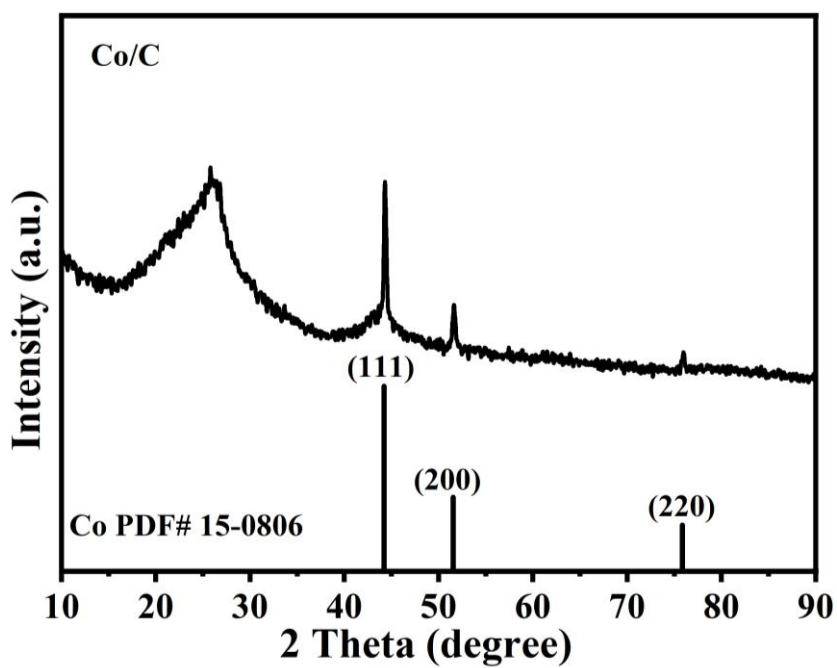

**Figure S10.** XRD patterns of Co/C.

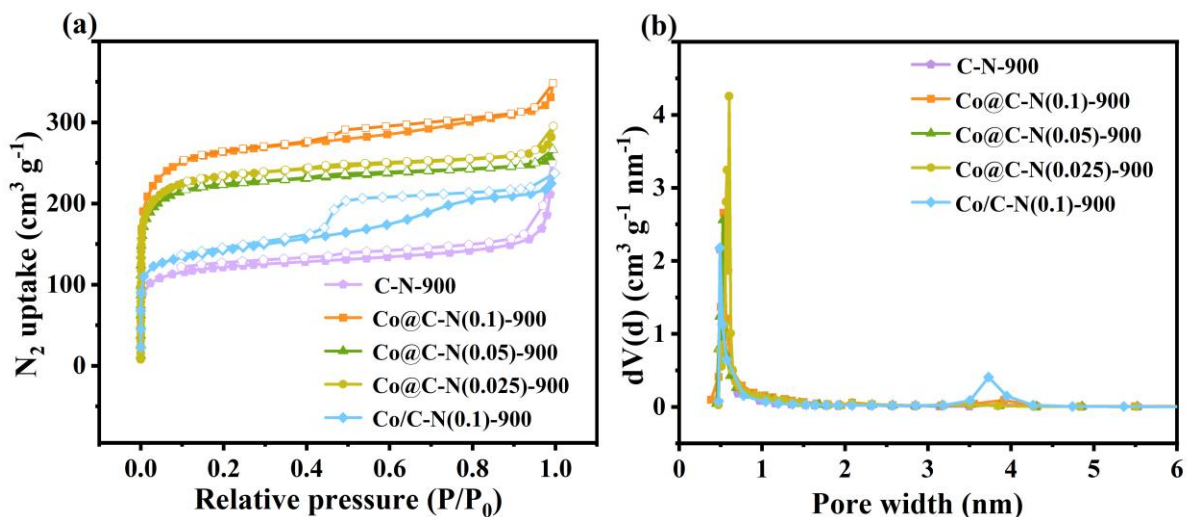

**Figure S11.** (a) N<sub>2</sub> adsorption isotherms and (b) pore size distributions of C-N-900, Co@C-N(x)-900, and Co/C-N(0.1)-900.

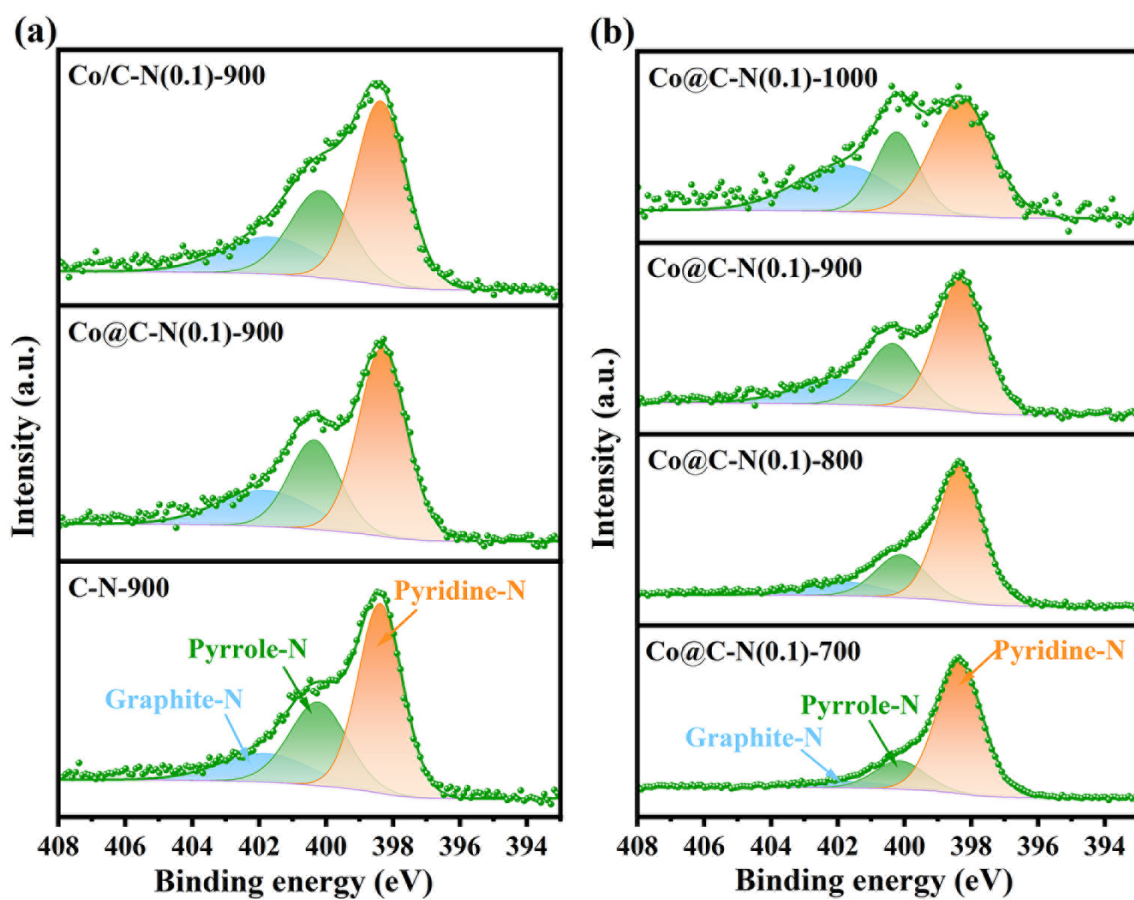

**Figure S12.** N 1s XPS spectra of C-N-900, Co@C-N(0.1)-T, and Co/C-N(0.1)-900.



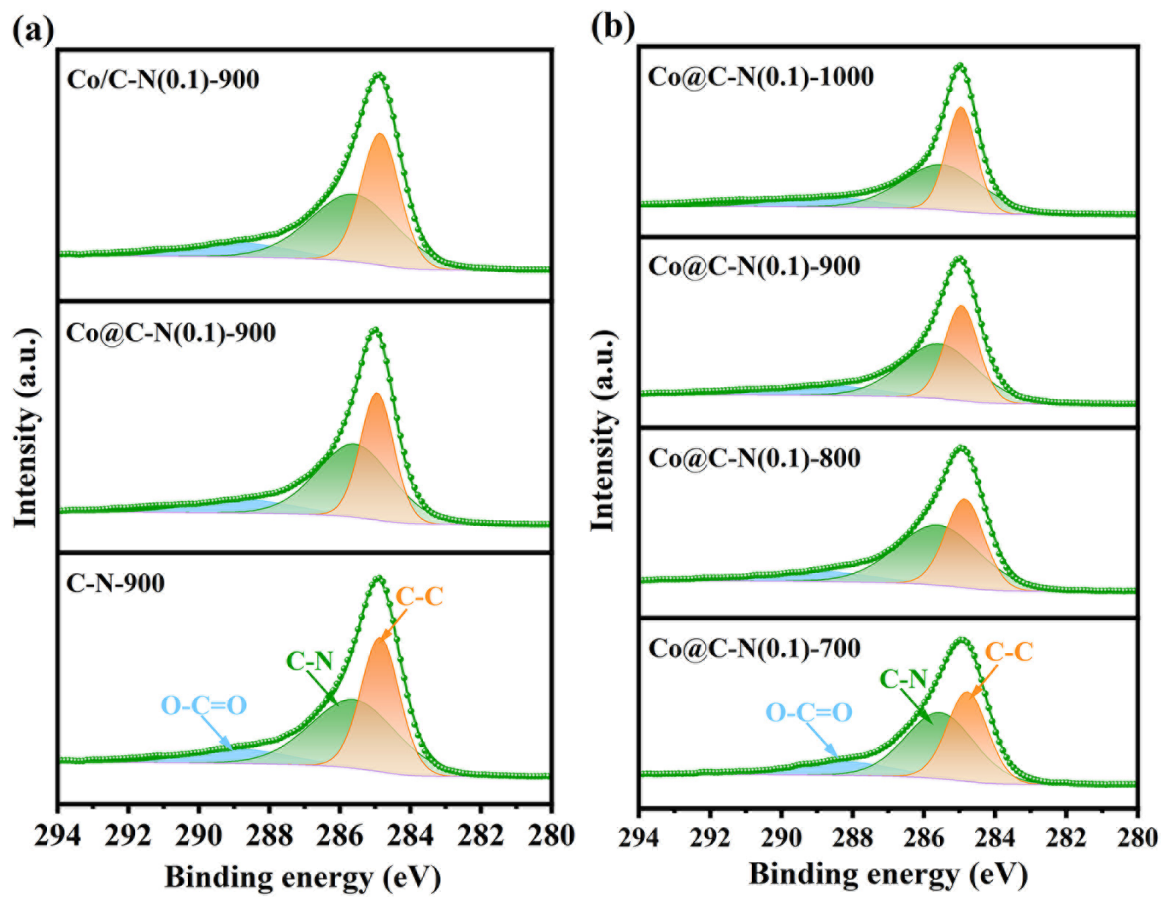

**Figure S13.** C 1s XPS spectra of C-N-900, Co@C-N(0.1)-T, and Co/C-N(0.1)-900.



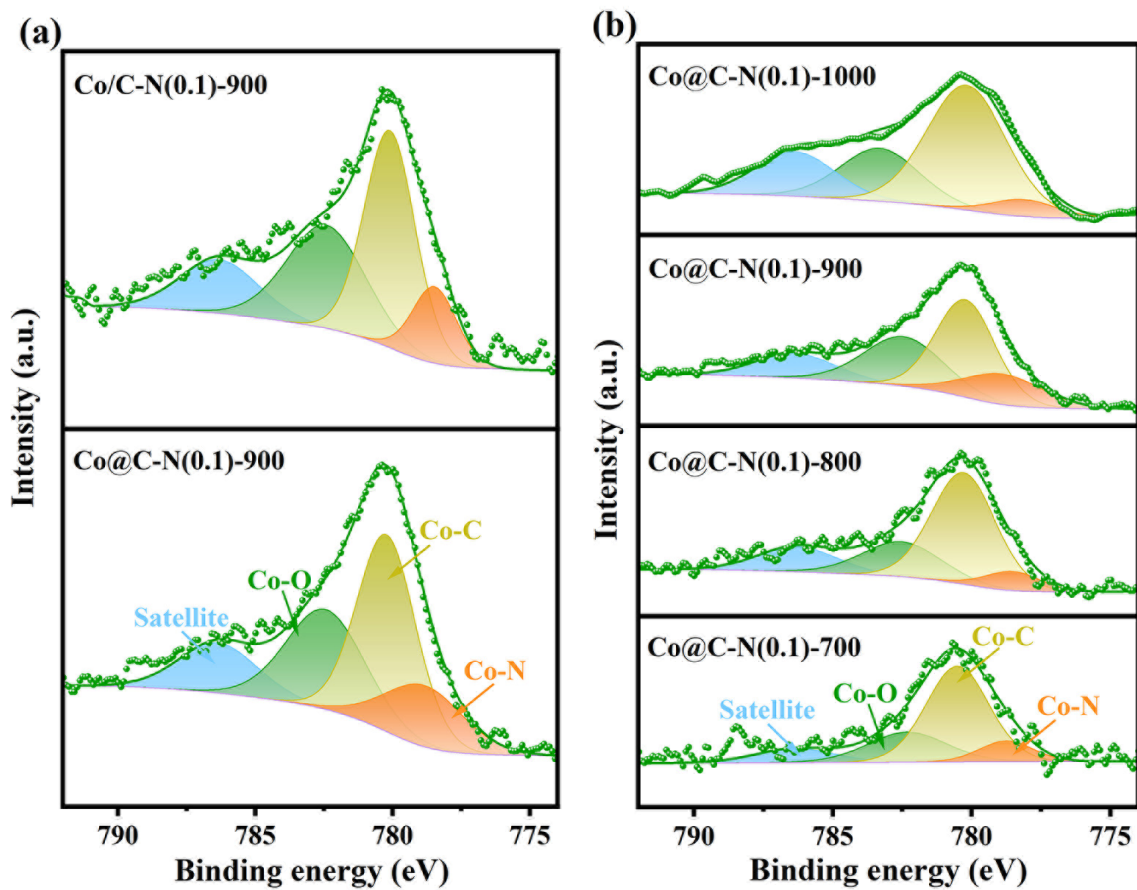

Figure S14. Co  $2p_{3/2}$  XPS spectra of Co@C-N(0.1)-T and Co/C-N(0.1)-900.

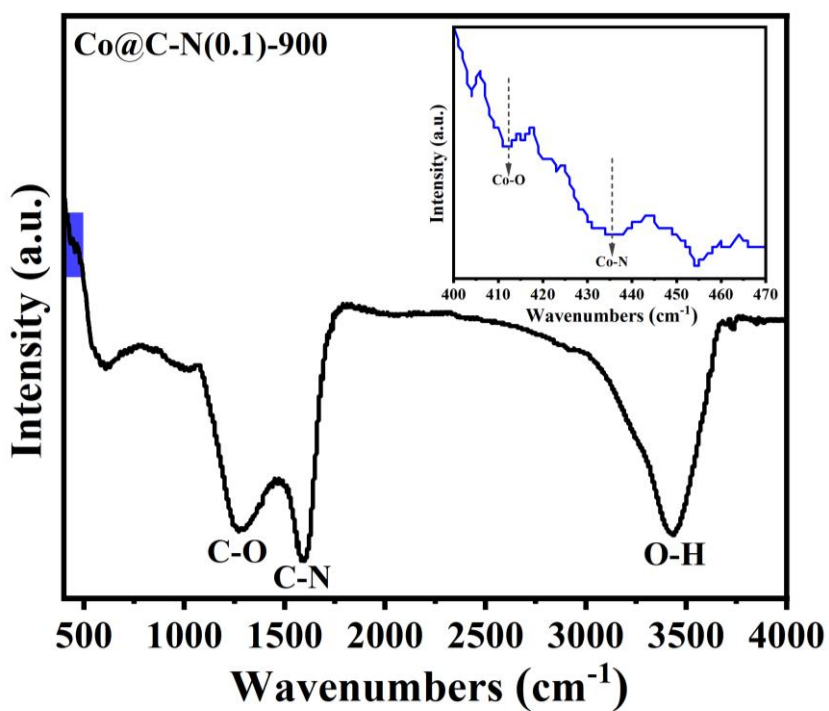

Figure S15. FTIR spectrum of Co@C-N(0.1)-900.

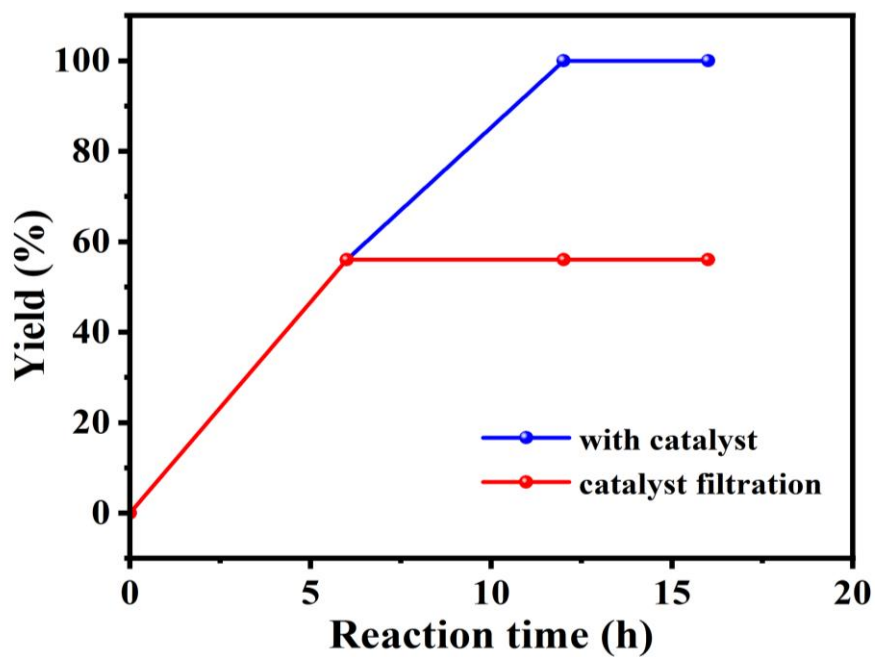

Figure S16. Heterogeneity test of Co@C-N(0.1)-900 for the oxidation of benzyl alcohol.

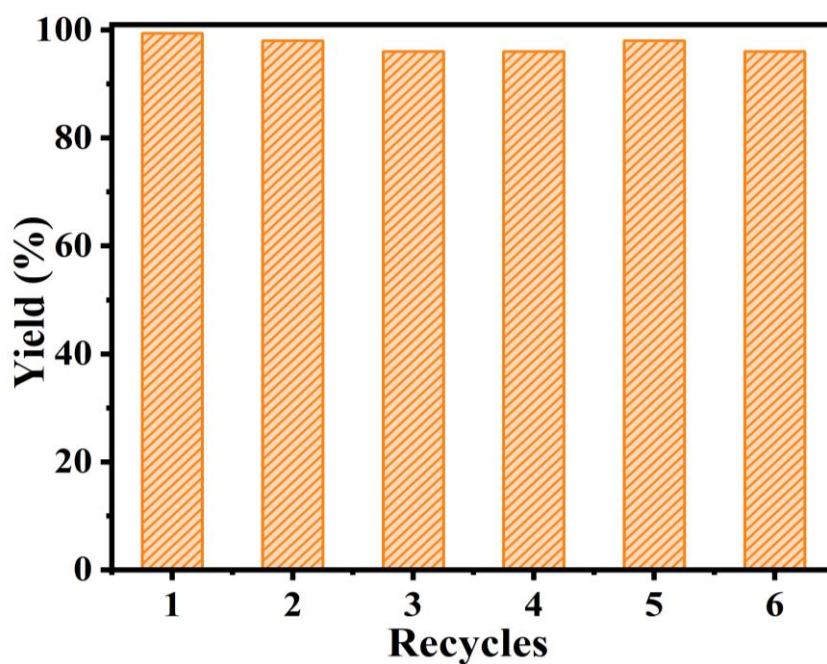

Figure S17. Reusability of Co@C-N(0.1)-900 in the aerobic oxidation of benzyl alcohol.

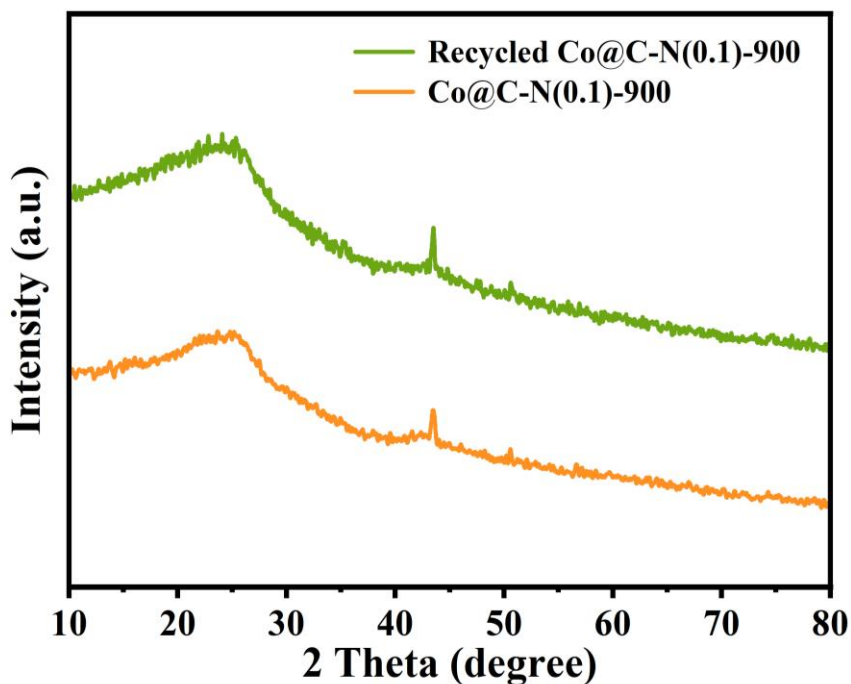

**Figure S18.** XRD patterns of Co@C-N(0.1)-900 and recycled Co@C-N(0.1)-900.

**Table S1.** Surface areas and pore volumes of the samples.

| Samples                               | $S_{\text{BET}}$ ( $\text{m}^2 \text{g}^{-1}$ ) | $S_{\text{Langmuir}}$ ( $\text{m}^2 \text{g}^{-1}$ ) | $V_{\text{pore}}$ ( $\text{cm}^3 \text{g}^{-1}$ ) |
|---------------------------------------|-------------------------------------------------|------------------------------------------------------|---------------------------------------------------|
| ZIF-8                                 | 1424                                            | 1922                                                 | 0.75                                              |
| [Bmim][CoCl <sub>3</sub> ]@ZIF-8-10%  | 1213                                            | 1798                                                 | 0.73                                              |
| [Bmim][CoCl <sub>3</sub> ]@ZIF-8-5%   | 1246                                            | 1801                                                 | 0.71                                              |
| [Bmim][CoCl <sub>3</sub> ]@ZIF-8-2.5% | 1287                                            | 1874                                                 | 0.70                                              |
| [Bmim][CoCl <sub>3</sub> ]/ZIF-8-10%  | 1219                                            | 1842                                                 | 0.68                                              |
| Co@C-N(0.1)-700                       | 353                                             | 524                                                  | 0.37                                              |
| Co@C-N(0.1)-800                       | 536                                             | 785                                                  | 0.34                                              |
| Co@C-N(0.1)-900                       | 824                                             | 1202                                                 | 0.52                                              |
| Co@C-N(0.1)-1000                      | 480                                             | 719                                                  | 0.43                                              |
| C-N-900                               | 381                                             | 564                                                  | 0.36                                              |
| Co@C-N(0.05)-900                      | 698                                             | 1009                                                 | 0.40                                              |
| Co@C-N(0.025)-900                     | 731                                             | 1066                                                 | 0.44                                              |
| Co/C-N(0.1)-900                       | 454                                             | 680                                                  | 0.35                                              |

**Table S2.** Co content of samples.

| Samples           | Content (wt%) <sup>a</sup> |
|-------------------|----------------------------|
| Co@C-N(0.1)-700   | 1.8                        |
| Co@C-N(0.1)-800   | 3.9                        |
| Co@C-N(0.1)-900   | 4.1                        |
| Co@C-N(0.1)-1000  | 5.5                        |
| Co@C-N(0.05)-900  | 1.2                        |
| Co@C-N(0.025)-900 | 0.7                        |

<sup>a</sup> Measured by ICP-OES.

**Table S3.** Oxidation of benzyl alcohol catalyzed by various catalysts<sup>a</sup>.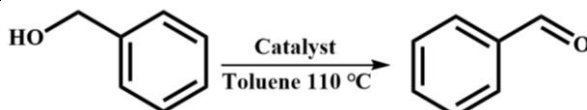

| Entry | Catalysts        | Co-N <sub>x</sub> content (%) <sup>b</sup> | Yield (%) <sup>c</sup> |
|-------|------------------|--------------------------------------------|------------------------|
| 1     | -                | -                                          | 0                      |
| 2     | C-N-900          | -                                          | 47                     |
| 3     | Co@C-N(0.1)-700  | 10.6                                       | 45                     |
| 4     | Co@C-N(0.1)-800  | 8.4                                        | 81                     |
| 5     | Co@C-N(0.1)-900  | 27.7                                       | <b>&gt;99</b>          |
| 6     | Co@C-N(0.1)-1000 | 20.6                                       | 68                     |
| 7     | Co/C-N(0.1)-900  | 12.6                                       | 70                     |

<sup>a</sup> Reaction conditions: benzyl alcohol (0.1 mmol), catalyst (10.5 mmol % Co), toluene (1 mL), air, 110 °C and 12 h.

<sup>b</sup> Measured by XPS.

<sup>c</sup> Yield was determined by GC-FID.

**Table S4.** Comparison of reaction results in oxidation of benzyl alcohol to benzaldehyde over different catalysts.

| Entry | Reaction conditions                                            | Conv. (%) | Sel. (%) | Ref.                                       |
|-------|----------------------------------------------------------------|-----------|----------|--------------------------------------------|
| 1     | Co-N-C/700, O <sub>2</sub> , toluene, 100 °C, 36 h             | 92        | 100      | New J. Chem., 2018, 42, 15871.             |
| 2     | Co@C-N(1)-800, air, water, 110 °C, 4 h                         | >99       | >99      | ACS Catal., 2018, 8, 1417.                 |
| 3     | Co/C-N700, air, water, 110 °C, 65 h                            | 92        | 99       | Green Chem., 2016, 18, 1061.               |
| 4     | Co@NC (800-2h), O <sub>2</sub> , EtOH, 80 °C, 30 h             | 99        | 96       | RSC Adv., 2017, 7, 1498.                   |
| 5     | Fe-N-C, O <sub>2</sub> , water, 80 °C, 8 h                     | 77        | 90       | ChemSusChem, 2017, 10, 359-362.            |
| 6     | Co-NG-750, O <sub>2</sub> , DMF, 130 °C, 5 h                   | 95        | 92       | Appl. Catal. A, 2017, 543, 61-66.          |
| 7     | Cu(bdc)(ted) <sub>0.5</sub> , O <sub>2</sub> , DMF, 90 °C, 8 h | 82        | 82       | RSC Adv., 2016, 6, 72433.                  |
| 8     | Pd <sub>3</sub> Cl/TNT, O <sub>2</sub> , toluene, 30 °C, 26 h  | 99        | 100      | Adv. Synth. Catal., 2018, 360, 4731- 4743. |
| 9     | Co@C-N(0.1)-900, air, toluene, 110 °C, 12 h                    | >99       | >99      | <b>This work</b>                           |
